# Supplementary material for: Synergistic Charge Transfer Effect in Ferrous Heme–CO Bonding within Cytochrome P450
Source: MDPI journal article supplement (doi:10.3390/molecules29040873), 2024-02-16
Supplement: s1 [file s1]

## 1. Hybrid AO specification

**Figure S1.** Input files for VBSCF-VB(all) calculations.

(a) Model I

```
CO-4s.1 ;;; GUS from 4s.0 ;;; ORB-18:ORB-16 ;;;ORB-17 from 4s.0.1
$CTRL
STR=FULL NAO=6 NAE=6 ISCF=5 IPRINT=3
ORBTYP=HAO FRGTYP=SAO
INT=LIBCINT BASIS=6-31g* NCHARGE=2
GUESS=READ
ITMAX=10000
$END
$FRAG
1*4 2*3
; Fe.
SPZDXXDYYDZZFZZZFXXZFYYZ 1
PXDZFXXXFXYYFXXZ 1
PYDYZFYYYFXXYFYZZ 1
DXY 1
; CO
SPZDXXDYYDZZ 2 3
PXDZ 2 3
PYDYZ 2 3
$END
$ORB
1*16 1*6
;core 1s of Fe
1
;core 2s of Fe
1
;core 2p6 of Fe
1
2
3
;core 1s of C and O
5
5
;valence 3s2 3p6 3d6 – 2 pi bonds ;;; the active sigma bond's electrons are from C
1
1
2
3
4
;bonds between C and O
5
6
7
;lone pair of O
```

```

5
;*****
;AO
;sigma of Fe
1
;sigma of CO
5
;pi-x
2
6
;pi-y
3
7
$END

```

(b) Model II

SH-4s.5 ;;; GUS from 4s.4.1 ;;; add FRAG 1 to ORB-18 ;;; adjust coeff of ORB-18, 1~38 (Fe) to 0.000...

```

$CTRL
STR=FULL NAO=6 NAE=6 ISCF=5 IPRINT=3
ORBTYP=HAO FRGTYP=SAO
INT=LIBCINT BASIS=6-31g* NCHARGE=1
GUESS=READ
ITMAX=10000
$END
$FRAG
1*4 2*3 2 1 1
; Fe.
SPZDXXDYYDZZFZZZFXXZFYYZ 1
PDXZFXXXFXYYFXZZ 1
PYDYZFYYFYXXYFYZZ 1
DXY 1
; CO
SPZDXXDYYDZZ 2 3
PDXZ 2 3
PYDYZ 2 3
; SH
SPZDXXDYYDZZ 4 5
PDXZ 4
PYDYZ 4
$END
$ORB
2*10 1*2 2*4 1 4 2*3 1*4 2 1 2 1 2 1
;core 1s of Fe
1 8
;core 2s of Fe
1 8
;core 2p6 of Fe
1 8

```

```

2 9
3 10
;core 1s of S
1 8
;core 2s of S
1 8
;core 2p of S
1 8
2 9
3 10
;core 1s of C and O
5
5 ;12
;valence Fe 3s2 3p6 3d6 – 2 pi bonds ;;; the active sigma bond's electrons are from C
1 8
1 8
2 9
3 10
4
;valence SH- 3s2 3p6
; S-H sigma bond
1 8 9 10 ;18
; S-Fe sigma bond
1 8
; pi of S ; no pi bond with Fe
2 9
3 10
;bonds between C and O
5
6
7
;lone pair of O
5 ;25
;;;;;;;
;AO
;sigma of Fe
1 8
;sigma of CO
5
;pi-x
2 9
6
;pi-y
3 10
7
$END

```

I Model III

nh-54s.0 ;;; GUS from nh-4444s.2 ;;; add FRAG 1,11 to ORB-22 ;;; adjust coeff of ORB-22,  
1~38 (Fe), 91~174 (NH3) to 0.000...

\$CTRL

STR=FULL NAO=6 NAE=6 ISCF=5 IPRINT=3

ORBTYP=HAO FRGTYP=SAO

INT=LIBCINT BASIS=6-31g\* NCHARGE=1

GUESS=READ

ITMAX=10000

\$END

\$FRAG

1\*4 2\*3 2 1 1 16

; Fe

SPZDXXDYYDZZFZZZFXXZFYYZ 1

PXDXZFXXXFXYYFXZZ 1

PYDYZFYYYFXXYFYZZ 1

DXY 1

; CO

SPZDXXDYYDZZ 2 3

PXDXZ 2 3

PYDYZ 2 3

; SH

SPZDXXDYYDZZ 4 5

PXDXZ 4

PYDYZ 4

; porphine

SPZDXXDYYDZZPXDXZPYDYZDXY 6-21

\$END

\$ORB

3\*3 2\*2 3\*3 2\*2 1\*2 3\*6 2\*2 1 5 3 2\*2 1\*4 3\*16 3 1 2 1 2 1

;core 1s of Fe

1 8 11

;core 2s of Fe

1 8 11

;core 2p6 of Fe

1 8 11

2 9

3 10

;core 1s of S

1 8 11

;core 2s of S

1 8 11

;core 2p of S

1 8 11

2 9

3 10

;core 1s of C and O

5

5

;core 1s of 4N of porphine

1 8 11

```

1 8 11
1 8 11
1 8 11
;valence Fe 3s2 3p6 3d6 - 2 pi bonds ;;; the active sigma b'nd's electrons are from C
1 8 11
1 8 11
2 9
3 10
4
;valence SH- 3s2 3p6
; S-H sigma bond
1 8 9 10 11
; S-Fe sigma bond
1 8 11 ;23
; pi of S ; no pi bond with Fe
2 9 ;24
3 10 ;25
;bonds between C and O
5
6
7
;lone pair of O
5 ;29
;valence 2s2 2p6 of 4N
1 8 11
1 8 11
1 8 11
1 8 11
1 8 11
1 8 11
1 8 11
1 8 11
1 8 11
1 8 11
1 8 11
1 8 11
1 8 11
1 8 11
1 8 11
1 8 11
1 8 11
,,,,,,,
;AO
;siga of Fe
1 8 11 ;46
;siga of CO
5 ;47
;pi-x
2 9
6
;and pi-y

```

3 10  
7  
\$END

(d) C<sub>2</sub>H<sub>2</sub>

c2h2-4.0.1 ;;; GUS from c2h2-4.0 ;;; 1;3 ;;; 2;4  
\$CTRL  
STR=FULL NAO=6 NAE=6 ISCF=5 IPRINT=3  
ORBTYP=HAO FRGTYP=SAO  
INT=LIBCINT BASIS=6-31g\* NCHARGE=0  
GUESS=READ  
ITMAX=10000  
\$END  
\$FRAG  
2\*4 2\*4  
;CH1  
SPZDXXDYYDZZFZZZFXXZFYYZ 1 3  
PDXZFXXXFXYYFXZZ 1 3  
PYDYZFYYYFXXYFYZZ 1 3  
DXY 1 3  
;CH2  
SPZDXXDYYDZZFZZZFXXZFYYZ 2 4  
PDXZFXXXFXYYFXZZ 2 4  
PYDYZFYYYFXXYFYZZ 2 4  
DXY 2 4  
\$END  
\$ORB  
1\*2 1\*2 1\*6  
;core 1s2 of C1, C2  
1  
5  
;valence  
;CH bond  
1  
5  
;AO  
;sigma  
1  
5  
;pi-x  
2  
6  
;pi-y  
3  
7  
\$END

## 2. Additional VB results

(a)  $\sigma$

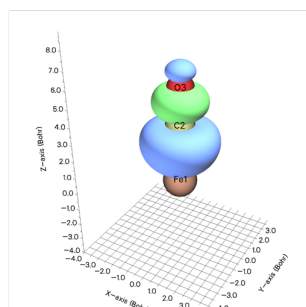

(b)  $\pi_x$

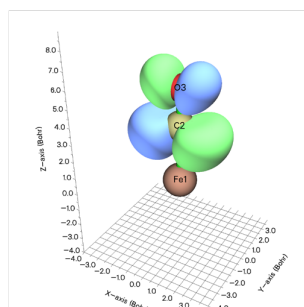

(c)  $\pi_y$

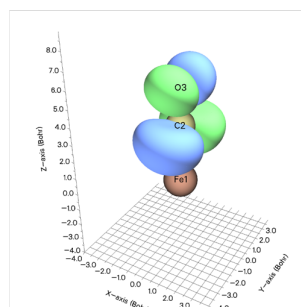

**Figure S2.** VB orbitals in the (a)  $\sigma$ , (b)  $\pi_x$ , and (c)  $\pi_y$  frameworks, obtained through the VBSCF-VB(all) calculation of model I.

(a)  $\sigma$

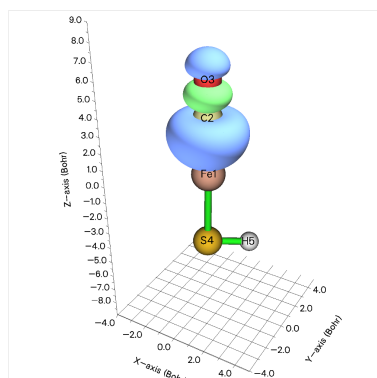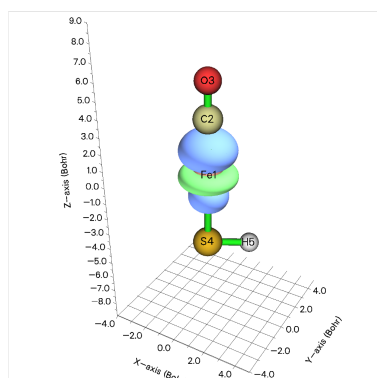

(b)  $\pi_x$

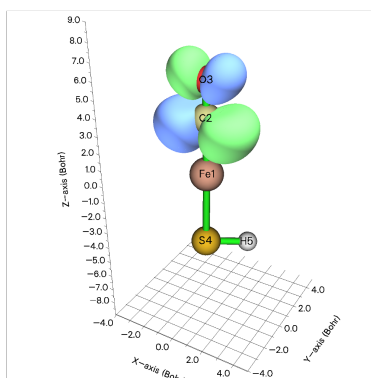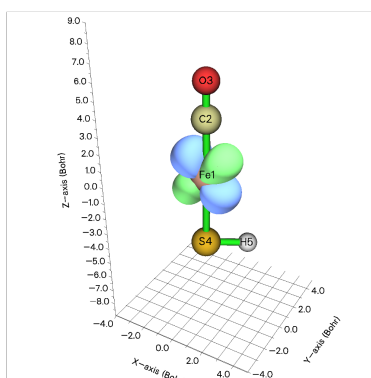

(c)  $\pi_y$

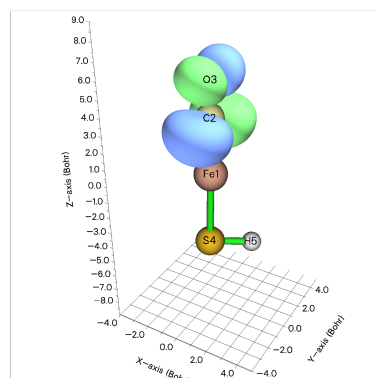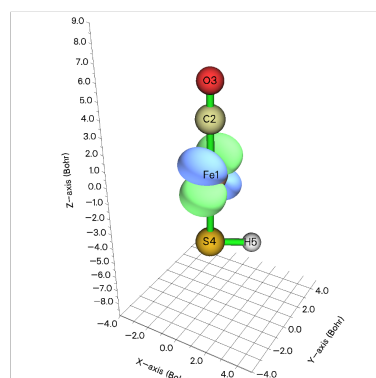

**Figure S3.** VB orbitals in the (a)  $\sigma$ , (b)  $\pi_x$ , and (c)  $\pi_y$  frameworks, obtained through the VBSCF-VB(all) calculation of model II.



(a)  $\sigma$

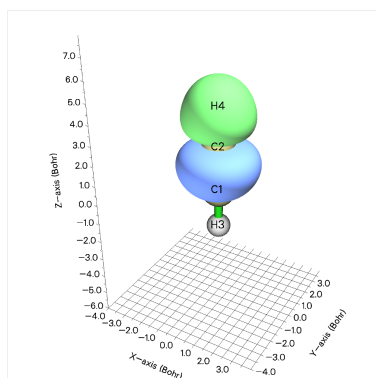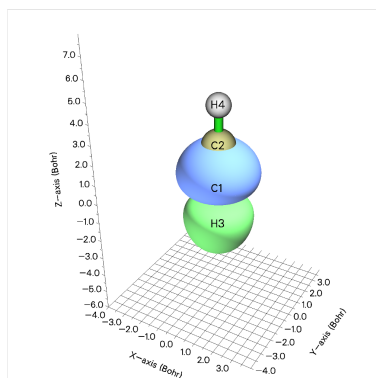

(b)  $\pi_x$

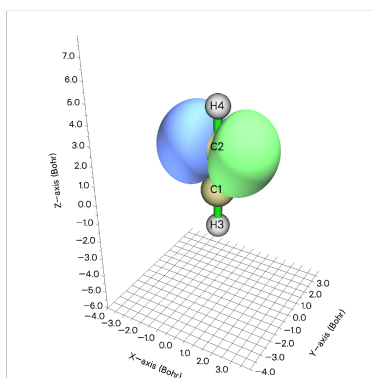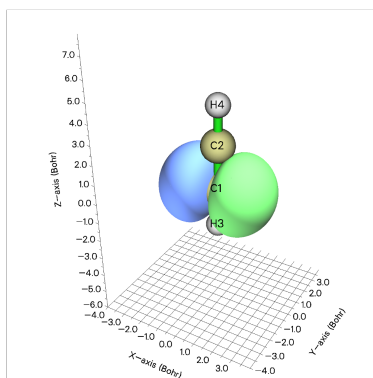

(c)  $\pi_y$

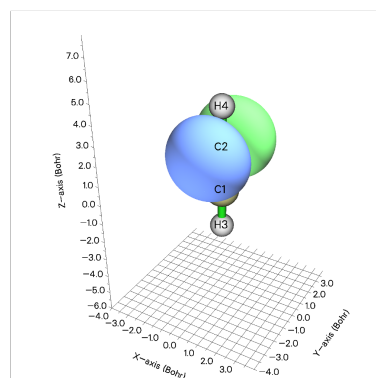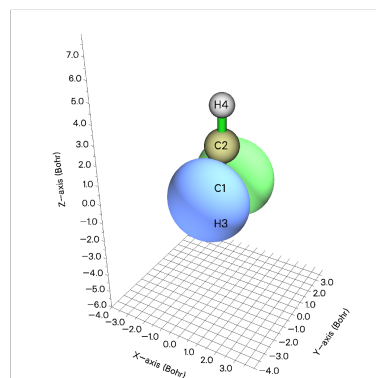

**Figure S4.** VB orbitals in the (a)  $\sigma$ , (b)  $\pi_x$ , and (c)  $\pi_y$  frameworks, obtained through the VBSCF-VB(all) calculation of  $\text{C}_2\text{H}_2$ .

**Table S1.** Total energies (in hartrees) obtained from (a) VBSCF and (b) BOVB calculations

(a) VBSCF

| model                         | $\Phi_1$      | $\sigma$      | $\pi_x$      | $\pi_y$            |
|-------------------------------|---------------|---------------|--------------|--------------------|
| I                             | -1374.031676  | -1374.074675  | -1374.038102 | -1374.038102       |
| II                            | -1772.437494  | -1772.465361  | -1772.449990 | -1772.450014       |
| III                           | -1997.396199  | -1997.421329  | -1997.416780 | -1997.416813       |
| C <sub>2</sub> H <sub>2</sub> | -76.816834    | -76.823409    | -76.840155   | -76.840155         |
| model                         | $\sigma\pi_x$ | $\sigma\pi_y$ | $\pi_x\pi_y$ | $\sigma\pi_x\pi_y$ |
| I                             | -1374.092430  | -1374.092430  | -1374.044602 | -1374.109883       |
| II                            | -1772.491082  | -1772.491117  | -1772.462654 | -1772.515700       |
| III                           | -1997.462991  | -1997.463021  | -1997.438138 | -1997.501059       |
| C <sub>2</sub> H <sub>2</sub> | -76.861107    | -76.861107    | -76.884840   | -76.915894         |

(b) BOVB

| model                         | $\Phi_1$      | $\sigma$      | $\pi_x$      | $\pi_y$            |
|-------------------------------|---------------|---------------|--------------|--------------------|
| I                             | -1374.031676  | -1374.077145  | -1374.039409 | -1374.039407       |
| II                            | -1772.437494  | -1772.467636  | -1772.452414 | -1772.452440       |
| III                           | -1997.396199  | -1997.423489  | -1997.420940 | -1997.420974       |
| C <sub>2</sub> H <sub>2</sub> | -76.816834    | -76.823808    | -76.840465   | -76.840465         |
| model                         | $\sigma\pi_x$ | $\sigma\pi_y$ | $\pi_x\pi_y$ | $\sigma\pi_x\pi_y$ |
| I                             | -1374.094543  | -1374.094542  | -1374.049276 | -1374.113064       |
| II                            | -1772.492363  | -1772.492410  | -1772.471253 | -1772.519539       |
| III                           | -1997.468229  | -1997.468186  | -1997.452143 | -1997.512422       |
| C <sub>2</sub> H <sub>2</sub> | -76.866474    | -76.866478    | -76.885822   | -76.932631         |

**Table S2.**  $\Delta RE$  values (in kcal/mol), obtained from (a) VBSCF and (b) BOVB calculations

(a) VBSCF

| model                         | $\Delta RE(\sigma\pi_x)$ | $\Delta RE(\sigma\pi_y)$ | $\Delta RE(\pi_x\pi_y)$ |
|-------------------------------|--------------------------|--------------------------|-------------------------|
| I                             | 7.11                     | 7.11                     | 0.05                    |
| II                            | 8.30                     | 8.31                     | 0.09                    |
| III                           | 13.23                    | 13.23                    | 0.47                    |
| C <sub>2</sub> H <sub>2</sub> | — <sup>a</sup>           | — <sup>a</sup>           | 13.41                   |

(b) BOVB

| model                         | $\Delta RE(\sigma\pi_x)$ | $\Delta RE(\sigma\pi_y)$ | $\Delta RE(\pi_x\pi_y)$ |
|-------------------------------|--------------------------|--------------------------|-------------------------|
| I                             | 6.06                     | 6.07                     | 1.34                    |
| II                            | 6.15                     | 6.17                     | 2.44                    |
| III                           | 12.55                    | 12.50                    | 4.03                    |
| C <sub>2</sub> H <sub>2</sub> | — <sup>a</sup>           | — <sup>a</sup>           | 13.63                   |

<sup>a</sup>. These  $\Delta RE$  values cannot be well defined because the  $\pi$  and  $\sigma$  contributions are effectively incorporated by MOs and thus cannot be clearly turned off in the VB( $\sigma$ ) and VB( $\pi$ ) calculations, respectively. In the VB( $\pi_x\pi_y$ ) calculation of C<sub>2</sub>H<sub>2</sub>, the MO-described  $\sigma$ -bonding effect can be cancelled.

### 3. Additional DFT results

(a) Model I

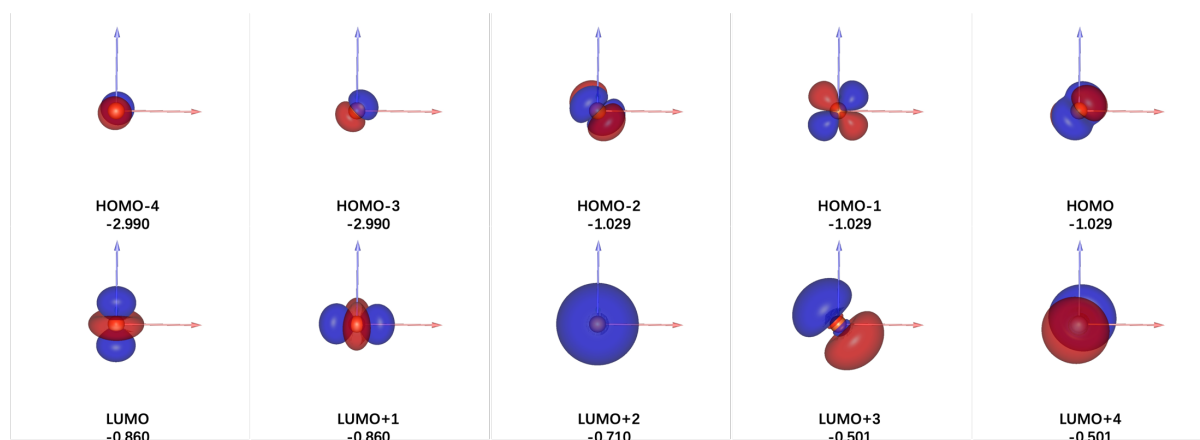

(b) Model II

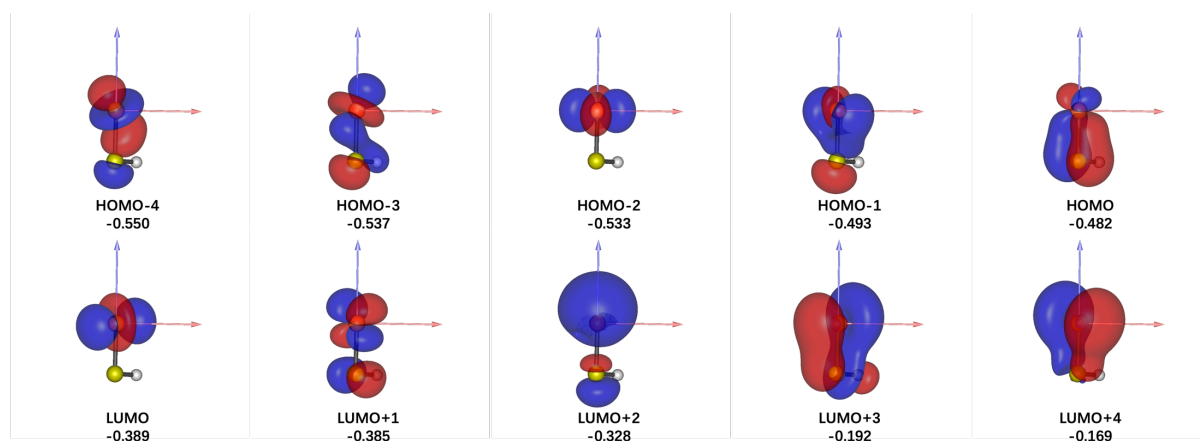

(c) Model III

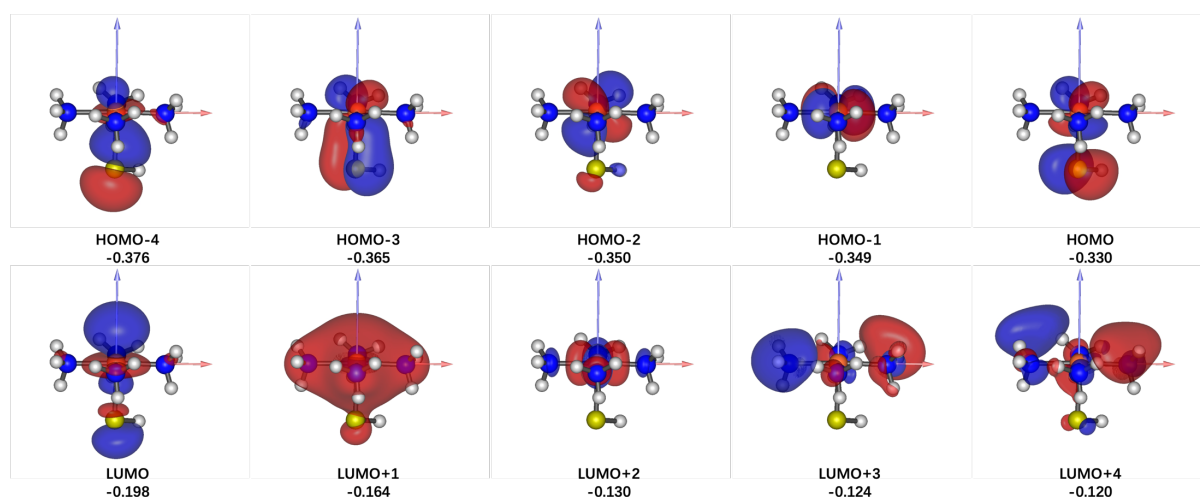

**Figure S5.** Frontier orbitals and their energy levels (in hartrees), obtained through B3LYP-D3BJ/def2-TZVP(6D,10F) calculations for models I-III, after removing the CO ligand.

#### 4. XYZ coordinates of models

**Table S3. XYZ coordinates (Å)**

**=== Model I ===**

|    |          |          |          |
|----|----------|----------|----------|
| Fe | 0.000000 | 0.000000 | 0.000000 |
| C  | 0.000000 | 0.000000 | 1.796227 |
| O  | 0.005462 | 0.005352 | 2.942542 |

**=== Model II ===**

|    |           |           |           |
|----|-----------|-----------|-----------|
| Fe | 0.000000  | 0.000000  | 0.000000  |
| C  | 0.000000  | 0.000000  | 1.796227  |
| O  | 0.005462  | 0.005352  | 2.942542  |
| S  | -0.031421 | -0.021799 | -2.393336 |
| H  | 0.962602  | 0.856852  | -2.608789 |

**=== Model III ===**

|    |           |           |           |
|----|-----------|-----------|-----------|
| Fe | 0.000000  | 0.000000  | 0.000000  |
| C  | 0.000000  | 0.000000  | 1.796227  |
| O  | 0.005462  | 0.005352  | 2.942542  |
| S  | -0.031421 | -0.021799 | -2.393336 |
| H  | 0.962602  | 0.856852  | -2.608789 |
| N  | 2.022512  | 0.000000  | -0.040263 |
| N  | 0.005449  | 2.022900  | -0.039572 |
| N  | -2.025181 | -0.002852 | -0.043785 |
| N  | -0.007745 | -2.025699 | -0.040421 |
| H  | 2.463174  | 0.908207  | 0.080583  |
| H  | 2.291743  | -0.321959 | -0.969606 |
| H  | 0.757143  | -2.470599 | 0.460604  |
| H  | -0.849346 | -2.478202 | 0.306739  |
| H  | -2.477451 | 0.686319  | 0.551526  |
| H  | -2.471580 | -0.886693 | 0.186905  |
| H  | -0.171431 | 2.286647  | -1.008996 |
| H  | 0.874711  | 2.473540  | 0.234242  |
| H  | 2.480237  | -0.609995 | 0.632669  |
| H  | 0.091843  | -2.292303 | -1.020862 |
| H  | -2.293680 | 0.213519  | -1.004519 |
| H  | -0.712745 | 2.472062  | 0.523376  |

**=== C<sub>2</sub>H<sub>2</sub> ===**

|   |          |           |           |
|---|----------|-----------|-----------|
| C | 0.000000 | 0.000000  | 0.000000  |
| C | 0.000000 | 0.000000  | 1.196745  |
| H | 0.001436 | 0.000000  | -1.062732 |
| H | 0.000480 | -0.000472 | 2.259534  |
